# Supplementary material for: Development of ELISAs for diagnosis of acute typhoid fever in Nigerian children
Source: PLoS Negl Trop Dis. 2017 Jun 22;11(6):e0005679. doi: 10.1371/journal.pntd.0005679 (PMC5498068; doi:10.1371/journal.pntd.0005679)
Supplement: S1 DATA_LPS_ARRAY — (XLSX) [file pntd.0005679.s007.xlsx]

## Sheet: Sheet1
Microarray data; Felgner et al, Figs. 1 and 2.
	Country	Nigeria		Nigeria		Nigeria		Nigeria		Spain		Thailand		Peru		Bangladesh		U.K.		U.S.		Mali, PNG, Kenya
	Age	Pediatric		Pediatric		Pediatric		Pediatric		Adult		Adult		Adult		Adult		Adult		Adult		Adult
	Infection	Typhoid		NTS		No Growth		Healthy control		Tularemia		Melioidosis		Brucellosis		Cholera		C. Diff.		Healthy control		Malaria
	Ig isotype	IgA	IgG	IgA	IgG	IgA	IgG	IgA	IgG	IgA	IgG	IgA	IgG	IgA	IgG	IgA	IgG	IgA	IgG	IgA	IgG	IgA	IgG
Antigen	S. Typhi LPS	35243	64086	405	88	414	19768	3	654	670	2682	19	8943	138	1644	28	1709	20	2185	12	41	1694	10732
	S. Typhi LPS	443	64574	2257	30	138	57784	-19	793	1333	25120	144	13626	1076	62536	35	18274	48	1880	8	855	48286	48513
	S. Typhi LPS	49325	63810	1113	-73	582	14	116	93	258	2429	18	6203	1753	60234	50	7334	117	3498	4	-3	3708	14903
	S. Typhi LPS	54168	21408	2658	62169	884	30	232	83	242	16388	198	3421	670	62842	-15	752	25	233	151	1960	4283	21296
	S. Typhi LPS	62341	61254	712	60602	594	1348	189	741	349	30761	42	6774	154	42821	225	49025	31	1563	186	5014	985	6648
	S. Typhi LPS	64491	63449	64569	93	1917	1357	1	852	671	61609	14	6639	4908	62672	157	25311	3152	8544	279	5308	15366	11290
	S. Typhi LPS	64243	62736	273	8	268	8817	8	9051	743	4005	60	3594	1368	3370	314	64494	20	457	654	2705	12150	22420
	S. Typhi LPS	1511	63810	7605	62739	560	3275	200	3753	1063	21312	37	3855	3222	61159			445	3595	30	362	7802	40440
	S. Typhi LPS	37280	63628	792	6954	211	15566	-27	3518	308	5177	602	2829	648	16856			381	3457	38	6317	2736	11003
	S. Typhi LPS	12951	65000	817	1927	1435	1		6	343	28024	109	1428	288	6139			763	8932	53	2331	5429	46754
	S. Typhi LPS	64385	65000	23093	49	447	22		61	260	17064	423	3095	799	63151			248	2033	16	77	7951	36880
	S. Typhi LPS	27300	60855	976	445	13224	2170		16520	587	61455	287	47960	5926	63269			943	14076	-12	254	777	8854
	S. Typhi LPS	35589	63481	44831	62405	458	705		986	142	1102	616	54612	-24	-226			-6	64	109	10125	1839	32159
	S. Typhi LPS	64352	65000	416	31	457	7		18	387	20935	293	32831	224	16368			1035	10516	31	64	778	1374
	S. Typhi LPS	64429	65000	358	7040	216	-38		-34	52	2437	820	63380	42	15922			2	39	585	3717	3364	11455
	S. Typhi LPS	36141	63601		1979	1639	1083		1153	45	10723	6265	49410	249	42881			1654	12576	132	563	2894	23489
	S. Typhi LPS	64539			7380	1542	14240		585	17	15026	679	26057	492	6975					36	610	72	1816.67
	S. Typhi LPS	64126			63872	1524	30075		521	124	29664	358	4342	2077	64278					213	7412	30349.7	35697.3
	S. Typhi LPS				50151		10894		4031	136	1823	38612	51428	3897	64050					172	302	290	3117.67
	S. Typhi LPS				3743		11219		135	350	18831	2829	29325	553	19397					151	28759	678.333	3167.33
	S. Typhi LPS				60604		5685		24666	59	3568	574	62591	35	21984					33	1286	-252.333	1141.33
	S. Typhi LPS				738		7669		2430	60	18338	1421	12083	503	16598					94	11283	3702.67	1778
	S. Typhi LPS				38212		6706		650	77	20102	178	23387	5052	63778					350	2103	2680.67	3751
	S. Typhi LPS				58471		8572		2810	34	28683	368	21747	308	19286					31	5542	1069.33	15390
	S. Typhi LPS				61285		1945		2191			1971	30746	95	7497					105	4532	864	7665.33
	S. Typhi LPS				60846		2245		1374			677	62841	542	3719					899	21208	1205	18735
	S. Typhi LPS				9726		4945		2557			411	26179	739	64195					359	18884	3657.33	25294.7
	S. Typhi LPS				995		16140		18598			768	55594	428	9278					39	4607	388	3896
	S. Typhi LPS				7739		11992		7114					324	10139					331	13303	406	10185.7
	S. Typhi LPS				46548		16598		4047					477	63096					267	41104	80.6667	537.333
	S. Typhi LPS						4650		10447					3140	62076					2089	41116	864.333	1324.67
	S. Typhi LPS						2767		34902					231	3058					1146	19621	532	9512.67
	S. Typhi LPS													834	64728					391	8835
	S. Typhi LPS													843	64402					28	1763
	S. Typhi LPS													2784	63609					38	1777
	S. Typhi LPS													1734	63689					270	5826
	S. Typhi LPS													1692	63950
	S. Typhi LPS													38	29990
	S. Typhi LPS													800	6143
	S. Typhi LPS													631	22458
	S. Typhi LPS													4	22945
	S. Typhi LPS													206	34481
	S. Typhi LPS													89	33065
	S. Typhi LPS													69	58731
	S. Typhi LPS													1745	28140
	S. Typhi LPS													4225	58429
	S. Typhi LPS													10294	60572
	S. Typhi LPS													837	49953
	S. Typhi LPS													174	44032
	S. Typhi LPS													731	40538
	S. Typhi LPS													5013	62862
	S. Typhi LPS													162	58563
	S. Typhi LPS													201	23846
	S. Typhi LPS													639	13300
	S. Typhi LPS													1224	63753
	S. Typhi LPS													725	25376
	S. Typhimurium LPS	15810	59678	5	4883	156	22315	-5	457	388	2173	1401	64544	736	22228	30	1659	nd	nd	111	4271	1347	12675
	S. Typhimurium LPS	893	64388	219	31241	138	63390	30	260	715	51490	7903	62781	597	63330	83	7581			105	21485	49227	48951
	S. Typhimurium LPS	372	4114	1097	63729	430	8012	5	7454	112	6867	814	42184	3698	62306	73	6869			1359	3615	3674	13099
	S. Typhimurium LPS	8517	61984	5393	62908	23	12420	16	46	86	13288	651	14535	202	5679	45	1605			54	7239	10654	23685
	S. Typhimurium LPS	3530	55681	25	16963	402	9125	23	42774	77	20193	25016	61358	1522	64720	141	36215			152	12087	882	3439
	S. Typhimurium LPS	3443	63560	3108	61911	35	8906	16	1634	392	9063	1406	26130	1116	64366	38	44760			4795	41721	5773	8309
	S. Typhimurium LPS	30056	63016	33	842	217	5165	27	759	507	3315	1465	62774	4029	63651	56	11067			669	30554	18651	25666
	S. Typhimurium LPS	774	60954	445	63052	83	5441	8	2373	519	36313	2544	31130	2916	63781					335	15423	3505	18734
	S. Typhimurium LPS	5138	63756	1282	56596	48	5587	26	965	132	9376	335	50394	1054	64108					803	45805	1621	14524
	S. Typhimurium LPS	65055	56940	47445	62693	107	2682	8	1324	145	23746	727	39923	67	39652					532	63934	5283	27975
	S. Typhimurium LPS	5830	63249	6712	61511	49	9582	-13	1973	89	33198	3247	61722	1169	25185					3463	60667	1828	9089
	S. Typhimurium LPS	3964	63398	118	16441	29	4545	27	26583	472	8530	1022	63336	872	33114					2312	27931	1443	9686
	S. Typhimurium LPS	5726	62861	13	1081	304	12147	24	9517			334	62072	7	19865					905	15860	1719	30235
	S. Typhimurium LPS	299	15072	32	5605	415	30418	7	6055			962	63564	271	40082					438	14799	1307	2833
	S. Typhimurium LPS	29116	63518	1030	62682	171	25296	1	11141					158	41436					68	1722	3299	17770
	S. Typhimurium LPS	1682	64474	12		21	3395	64	28447					106	37111					926	18330	4165	22450
	S. Typhimurium LPS													3634	58144
	S. Typhimurium LPS													8309	57932
	S. Typhimurium LPS													11816	60845
	S. Typhimurium LPS													883	37808
	S. Typhimurium LPS													188	60866
	S. Typhimurium LPS													285	35887
	S. Typhimurium LPS													3423	62728
	S. Typhimurium LPS													381	56307
	S. Typhimurium LPS													235	22859
	S. Typhimurium LPS													1093	15003
	S. Typhimurium LPS													1053	63705
	S. Typhimurium LPS													71	34779
	F. tularensis LPS	1580	161	13	48	4157	35077	-3	55	363	755	2	78	173	7772	15	393	30	192	621	2033	-44	34.6667
	F. tularensis LPS	-9	147	-3	977	19	22	12	173	7342	62298	27	189	830	11525	128	3824	857	4942	279	26281	385.667	639.333
	F. tularensis LPS	152	460	99	19	213	614	4	1	104	3472	-11	35	649	15439	42	1593	51	330	2614	9263	131	377.667
	F. tularensis LPS	1638	5149	115	12741	12	107	-2	20	36402	62339	52	5784	671	12158	25	49	335	271	163	381	3455.33	10712.3
	F. tularensis LPS	4341	50016	58	5619	10	55	5	54	24860	58201	63	6141	568	8977	76	9703	6153	12183	5279	16349	-22.3333	14631.3
	F. tularensis LPS	554	356	365	1492	177	228	-4	456	3268	3193	123	6081	2037	20761	64	604	25763	871	1621	13762	3322.67	1158
	F. tularensis LPS	16	123	3	25	1241	18686	55	19505	64504	63971	32	436	3814	3254	6	811	2218	5704	1695	30440	418.667	-351
	F. tularensis LPS	8452	16525	19	1208	396	652	1	20	64283	60439	51	512	0	16611			4137	120	156	1408	37.3333	144
	F. tularensis LPS	48	1395	1270	158	141	20418	8	248	63525	59423	56	47	2470	8472			2240	2585	141	20595	20	585.333
	F. tularensis LPS	652	751	4170	51	6189	35175	7	17	63689	61573	9	7	481	7310			943	1944	1579	1321	641	1048
	F. tularensis LPS	10	1311	3394	987	149	10733	9	78	63745	62926	102	191	1855	19005			1881	1313	360	1549	146.333	863.667
	F. tularensis LPS	1649	11094	83	136	64	404	-14	9549	63940	61735	238	11813	7238	63900			14410	62645	866	63729	91	58
	F. tularensis LPS	24	131	19	13988	1231	389	-5	355			345	16349	2830	18806			637	1229	650	8337	744	6852.67
	F. tularensis LPS	1052	152	-2	760	215	3146	2	16			296	12680	312	7058			1088	20735	4586	17546	1135.67	911.333
	F. tularensis LPS	285	14916	64	41	487	18995	10	13					245	7006			782	1950	2814	7784	810.333	2992.67
	F. tularensis LPS	542	928			1579	2336	13	17					11749	15008			1363	37109	476	419	891	989.667
	F. tularensis LPS													2789	56193					892	4332
	F. tularensis LPS													572	4340					569	940
	F. tularensis LPS													1825	9708					4670	19573
	F. tularensis LPS													995	32408					262	24952
	F. tularensis LPS													910	10434
	F. tularensis LPS													1517	18706
	F. tularensis LPS													1705	63680
	F. tularensis LPS													2522	6457
	F. tularensis LPS													442	9814
	F. tularensis LPS													1499	9826
	F. tularensis LPS													996	1553
	F. tularensis LPS													8484	7124
	B. pseudomallei LPS	545	1581	94	157	1052	64219	-14	53	722	339	21190	63502	181	24450	26	700	24	846	193	3365	113	393
	B. pseudomallei LPS	290	64777	252	262	888	5276	-4	241	522	1018	27483	63849	368	2398	33	3816	133	11184	142	792	2040	1671
	B. pseudomallei LPS	357	4716	341	531	361	1530	1	299	6451	20055	6664	61300	1337	18402	262	3572	34	1422	774	4122	1759	2378
	B. pseudomallei LPS	1011	6344	2019	62255	425	2451	17	50	222	1502	30931	62705	366	2330	23	3637	102	12172	614	3687	1290	2706
	B. pseudomallei LPS	876	6066	55	6792	7	1200	-24	107	887	17369	14472	61901	167	581	424	21399	290	2045	1767	29193	249	605
	B. pseudomallei LPS	793	63763	132	79	63	40063	13	2191	688	11265	30680	61766	520	401	9	2100	557	842	590	1750	1559	1780
	B. pseudomallei LPS	33	448	0	821	123	1549	8	1100	1241	361	63938	62171	964	969	85	6066	83	1097	276	5267	2006	2499
	B. pseudomallei LPS	643	12963	18	846	39	140	25	816	482	1196	10331	62264	565	3297			635	991	303	2390	1060	2709
	B. pseudomallei LPS	22	780	344	7453	291	1411	8	79	7554	24963	58520	59057	77	2806			82	100	122	4709	1222	7150
	B. pseudomallei LPS	536	3048	282	63500	1066	9720	1	765	286	2423	5941	62070	349	63309			68	919	448	982	1101	1199
	B. pseudomallei LPS	217	63654	1208	2918	13	270	0	147	469	9916	58599	62586	479	11076			53	121	177	1882	1562	8500
	B. pseudomallei LPS	706	13974	219	1566	35	168	8	827	449	9524	35725	62440	484	2018			392	4847	380	12417	732	468
	B. pseudomallei LPS	38	1150	16	4833	270	2721	24	78			28629	61503	440	1560			663	4847	123	2502	588	7836
	B. pseudomallei LPS	1363	1158	83	1246	441	2227	23	497			64614	63680	41	339			703	2908	418	5896	1158	845
	B. pseudomallei LPS	244	22180	214	18249	591	1685	-2	55					109	2714			248	2792	1103	5625	567	693
	B. pseudomallei LPS	425	469	0	2031	57	844	-9	36					7	-83			553	2911	272	3100	647	989
	B. pseudomallei LPS	225	5216	5	2073	46	11601	24	699					166	244					367	7713	-50	28.6667
	B. pseudomallei LPS	31	22984	44	1607	34	3267	31	70					43	279					57	774	201.667	381.333
	B. pseudomallei LPS	11	787	241	3305	-4	3093	-1	920					324	4305					1077	6920	260	500.667
	B. pseudomallei LPS	239	4119	40	2792	4	4780	13	75					101	1647					166	1830	335.333	1843.33
	B. pseudomallei LPS	473	11446	234	15846	49	1802	30	2627					52	15546					178	2624	91.6667	266.333
	B. pseudomallei LPS	53	4880	3	833	133	6166	16	843					319	9780					121	5773	-28.3333	154
	B. pseudomallei LPS	319	3773	1	1454	52	4074	38	719					6171	63869					581	5470	530.667	-22
	B. pseudomallei LPS	132	19313	159	43064	32	451	10	512					350	3758					116	3696	1.33333	742
	B. pseudomallei LPS	122	2683	404	6669	28	3858	7	795					219	6039					144	3054	-21	1338.33
	B. pseudomallei LPS	618	5258	106	5445	42	1844	45	409					416	11504					489	3438	161	190
	B. pseudomallei LPS	538	63557	84	22803	36	10656	-1	1598					212	23340					223	6357	258.333	2610.67
	B. pseudomallei LPS	99	2216	23	1519	32	4927	36	1941					245	1883					425	9732	375	663
	B. pseudomallei LPS	406	10793	32	5602	406	1119	15	1223					128	63809					304	7480	144	2110.67
	B. pseudomallei LPS	21	1343	341	17697	55	4736	24	616					201	4338					73	2560	24.6667	259.333
	B. pseudomallei LPS	104	4694	10		231	5060	13	1432					187	4120					116	4056	71.3333	145.667
	B. pseudomallei LPS	22	20727			9	1449	8	396					262	21403					434	5502	285	301.667
	B. pseudomallei LPS													358	4363					498	2076
	B. pseudomallei LPS													177	2382					210	6527
	B. pseudomallei LPS													306	2723					141	2222
	B. pseudomallei LPS													365	3384					207	4683
	B. pseudomallei LPS													557	7847
	B. pseudomallei LPS													41	2001
	B. pseudomallei LPS													618	4033
	B. pseudomallei LPS													172	3277
	B. pseudomallei LPS													13	4829
	B. pseudomallei LPS													156	3373
	B. pseudomallei LPS													117	4384
	B. pseudomallei LPS													35	-187
	B. pseudomallei LPS													153	-108
	B. pseudomallei LPS													34	3271
	B. pseudomallei LPS													123	5979
	B. pseudomallei LPS													56	1791
	B. pseudomallei LPS													52	11094
	B. pseudomallei LPS													224	4966
	B. pseudomallei LPS													1717	55504
	B. pseudomallei LPS													121	6590
	B. pseudomallei LPS													52	2640
	B. pseudomallei LPS													205	9139
	B. pseudomallei LPS													122	14299
	B. pseudomallei LPS													81	3809
	B. melitensis LPS	11	207	7	44	-18	180	13	5	3176	2298	5	20	64990	63962	14	1368	784	64433	0	-10	-8	317.667
	B. melitensis LPS	-16	1613	-5	17	11	27	-2	24	0	51	42	33	20029	63132	4	-9	121	321	7	38	144.667	232.333
	B. melitensis LPS	29	661	70	409	33	161	6	9	-11	255	5	23	4568	62295	0	402	1282	64132	32	33	181	37.6667
	B. melitensis LPS	-3	-106	19	79	24	52	7	1	36	271	5	26	25682	61987	-11	334	26	-10	30	3453	237.333	841.333
	B. melitensis LPS	262	2146	12	1081	22	57	4	-6	-10	53	4	27	2491	62613	4	10	63	205	24	198	20.6667	-69.6667
	B. melitensis LPS	20	-76	34	39	37	-50	24	176	61	492	4	17	56747	61429	20	495	19	15	52	114	-8.33333	571
	B. melitensis LPS	9	70	11	2	-17	122	8	-1	60729	63919	28	7	63822	59972	72	173	19	37	10	48	205.667	235
	B. melitensis LPS	42	469	36	56	36	35	-12	165	-2	117	5	8	52564	60363			45	25	17	2456	6.33333	-147
	B. melitensis LPS	20	131	-26	54	-16	-370	5	31	212	724	0	-12	63847	61180			12	22	-18	19	134	285.333
	B. melitensis LPS	26	60	-20	20	2	1434	16	156	8	-3	14	21	63973	62873			18	62	28	120	253	310
	B. melitensis LPS	13	343	79	187	-9	68	32	-3	57	86	15	10	64474	62317			-5	-31	24	78	149.333	331.667
	B. melitensis LPS	40	-40	35	50	-2	29	4	7	68	840	-5	3	3768	62096			15	78	17	32	89	86
	B. melitensis LPS	43	1236	28	76	2	30	19	53			7	34	8265	62592			0	454	0	27	101	418.667
	B. melitensis LPS	22	28	22	17	-14	84	31	38			6	-24	3745	63978			22	70	23	64	161.667	440.333
	B. melitensis LPS	7	35	13	62	74	5159	36	5					9422	63255			11	81	58	107	372.333	415.667
	B. melitensis LPS	-2	74			-16	26	-17	-25					55361	64220			23	-44	17	115	229	190.667
	B. melitensis LPS													10658	53919					43	80
	B. melitensis LPS													43549	63598					11	57
	B. melitensis LPS													5818	63461					28	34
	B. melitensis LPS													47402	63368					28	69
	B. melitensis LPS													64701	60467
	B. melitensis LPS													2956	63907
	B. melitensis LPS													349	853
	B. melitensis LPS													21054	63853
	B. melitensis LPS													3766	64467
	B. melitensis LPS													23397	64317
	B. melitensis LPS													526	64316
	B. melitensis LPS													25797	64225
	V. cholerae LPS	-5	10	1	66	-9	-72	-8	12	2	2	32	399	0	51	18257	44645	16	5	18	38	-34	94
	V. cholerae LPS	0	-52	16	28	5	162	17	3	-15	-52	14	-14	22	88	1831	73	-35	-4	28	54	416	-85
	V. cholerae LPS	-9	41	4	-16	3	63	-3	6	-12	-14	-28	-69	35	66	49228	28633	11	5	21	15	774	136
	V. cholerae LPS	11	18	2	55	10	63	-5	20	-2	69	35	60	0	92	6907	22918	-61	-396	0	47	775	448
	V. cholerae LPS	47	35	7	10	0	3	-23	-22	-48	1	29	13	15	854	430	23	2	-106	6	-26	235	425
	V. cholerae LPS	-20	143	6	40	28	65	14	33	4	-37	-15	-27	1611	67	64824	64246	-4	-6	25	243	1685	1043
	V. cholerae LPS	131	-4	9	30	-17	-90	22	-6			0	85	1436	61328	64424	57324	25	56	-4	-52	-204	190
	V. cholerae LPS	39	34	-11	30	-9	23	2	23			-8	190	782	134	18363	64193	-4	23	22	-14	69	293
	V. cholerae LPS	-1	18	-3	22	14	273	5	7			-15	-24	51	63109	4283	170	-10	10	190	32	211	57
	V. cholerae LPS	6	10	5	69	-14	-145	1	15			17	-859	55	-16	55792	41833	1	-15	-17	167	-14	-151
	V. cholerae LPS	5	48	1	-2	0	65	3	-24			-67	10	221	20159	25124	28010	-24	4	-4	27	337	1025
	V. cholerae LPS	38	79	3	30	0	-10	3	14			0	-165	4	164	920	188	20	22	-14	-29	464	402
	V. cholerae LPS	66	13	35	-14	5	27	-11	-27			-19	-34	-16	31	64771	64182	16	56	0	59	317	7
	V. cholerae LPS	9	26	29	-2	22	26	3	15			-6	44	2	28	64201	61815	-10	-15	15	-5	118	10
	V. cholerae LPS	21	46	14	13	406	353	22	-27			201	89	0	67	63383	64699	-4	-37	13	35	133	69
	V. cholerae LPS	36	23	-13	-9	-20	-30	-26	1			12	206	9	29	65051	12975	5	93	-9	-14	658	543
	V. cholerae LPS	7	45	10	-1	-25	-9	-8	0			5	114	4	-21	65071	12829	-6	12	31	61	86	275.667
	V. cholerae LPS	12	8	6	6	189	5251	2	-14			4	85	93	56	5564	24656	5	-5	149	6	22.6667	-316.667
	V. cholerae LPS	-5	70	-13	36	-24	2	17	20			16	353	23	8172	492	39	-10	28	8	-49	-11	79.6667
	V. cholerae LPS	-3	94	32	695	15	19	10	14			28	-2	-31	30	64748	16008	5	8	1	38	-28.6667	815.333
	V. cholerae LPS	30	42	27	28	-7	-23	-18	31			17	52	-20	3695	64375	29996	4	197	0	34	-383.333	-136.667
	V. cholerae LPS	10	11	-6	-12	32	-59	24	-15			14	39	-17	17	52172	64202	8	33	17	32	-123.333	-83
	V. cholerae LPS	0	0	36	41	-12	97	22	5			-2	442	-6	822	58061	15146	14	42	-3	12	-15.3333	-204
	V. cholerae LPS	-5	55	-1	-8	4	-22	3	36			6	-21	3	870	65028	36846	-12	21	-6	7	-457.667	-48
	V. cholerae LPS	14	59	11	-32	0	14	-30	14			3	40	5	25	6071	32501	4	2	12	-2	145	311.333
	V. cholerae LPS	3	18	-7	30	9	20	29	436			29	422	-4	-8	650	-510	-13	26	-15	45	-154	-346
	V. cholerae LPS	14	34	12	25	33	30	13	-11			-21	23	434	33	64855	20388	-10	-8	11	-50	-236.667	73.6667
	V. cholerae LPS	-3	36	7	20	48	67	-8	8			-42	-78	-3	27	64313	30446	-5	65	-2	17	503	627
	V. cholerae LPS	22	-17	5	-10	11	66	35	19					-10	3			18	29	-25	-21	221	-170.333
	V. cholerae LPS	36	15	7	27	-10	76	-8	125					10	12			22	31	9	-6	-173.333	-75.6667
	V. cholerae LPS	4	16			695	14130	14	1					12	8			22	125	-4	55	-151.667	-272.333
	V. cholerae LPS	22	15			0	-31	15	14					7	4			8	545	5	131	36	-110.333
	V. cholerae LPS	-5	10											7	29					3	19	-11	-151
	V. cholerae LPS													9	10					-6	22	492	213
	V. cholerae LPS													-18	11					26	1179	1495	682
	V. cholerae LPS													11	63					31	-11	770	273
	V. cholerae LPS													6	-1					-2	46	153	-160
	V. cholerae LPS													-12	14					1	-16	505	342
	V. cholerae LPS													-14	103					22	34	61	517
	V. cholerae LPS													4	1787					-6	28	100	690
	V. cholerae LPS													17	11							-414	-422
	V. cholerae LPS													0	-8							326	188
	V. cholerae LPS													9	9							-76	901
	V. cholerae LPS													25	-16							230	307
	V. cholerae LPS													5	57							-109	-354
	V. cholerae LPS													12	-12							270	592
	V. cholerae LPS													-14	30							-59	47
	V. cholerae LPS													-38	9							110	219
	V. cholerae LPS													-28	-15							180	427.667
	V. cholerae LPS													5	-16							100.667	36.3333
	V. cholerae LPS													29	-26							-310	-430.333
	V. cholerae LPS													6	13							-119.667	281.333
	V. cholerae LPS													27	13							170.667	154.333
	V. cholerae LPS													4	20							232.667	477
	V. cholerae LPS													-12	73							10.6667	-68
	V. cholerae LPS													31	63							-316.667	-369
	V. cholerae LPS																					308	463.333
	V. cholerae LPS																					22	-57
	V. cholerae LPS																					189.333	-267.333
	V. cholerae LPS																					-18	-56
	V. cholerae LPS																					108	-9.33333
	V. cholerae LPS																					15.6667	-30.6667
	V. cholerae LPS																					66.3333	165.667
	V. cholerae LPS																					124	17.6667
	E. coli LPS	437	2549	107	281	116	5935	-27	318	2413	975	40	6658	3497	536	238	6072	55	199	-12	201	4	-1.33333
	E. coli LPS	453	30737	342	81	125	2234	-3	81	454	2442	293	12519	1557	64020	6	214	12	712	832	8592	887.667	1372.33
	E. coli LPS	501	1199	2155	5211	30977	13939	64	113	3644	7202	21	4943	992	17138	16	2019	96	364	1819	1281	313	1407.67
	E. coli LPS	1461	11736	1444	46596	202	2879	-14	-1	2839	9188	24	312	961	63782	15	467	30	112	1830	33991	5096.33	4146.33
	E. coli LPS	2487	16117	33	5791	49	390	-45	215	877	3344	15	210	34	8382	64	1162	527	3719	1534	12979	178.667	552.333
	E. coli LPS	691	1391	1726	63842	109	2708	-33	1321	520	4062	25	470	1193	13196	10	1025	15927	12768	749	7081	501.667	593
	E. coli LPS	522	4874	-35	497	81	13206	-21	2489	2585	933	53	1757	903	4889	38	3471	50	1110	210	1047	472.667	1048
	E. coli LPS	882	6875	-41	1559	518	870	-42	334	220	700	83	1982	38082	62566			15725	10181	27	2231	319.333	645
	E. coli LPS	44	7066	328	8569	148	11421	-14	1730	4602	7824	81	915	2745	8592			2830	1680	88	2826	-5	385.333
	E. coli LPS	18396	4494	529	460	145	19365	-17	1393	2820	14229	35	446	961	756			18	924	2010	5071	303	5329
	E. coli LPS	93	8337	2011	1712	20	4842	-20	66	2236	886	6937	1654	1493	12680			1782	1574	199	2788	1803.33	2145.67
	E. coli LPS	2276	62259	24	1255	68	2358	-6	2417	480	1812	167	1177	1394	22694			5412	5750	56	1376	13	44
	E. coli LPS	715	7460	1316	39054	415	22301	-30	31			317	1323	1506	6635			271	7438	669	1340	1916	2724.67
	E. coli LPS	1498	24656	390	5376	840	5340	46	627			227	1164	2113	1270			2299	2299	745	9100	106.667	299.333
	E. coli LPS	155	1798	197	7460	12422	29875	-17	-7					2172	1333			304	6816	1076	2418	-28.6667	368.667
	E. coli LPS	315	1838			40	8830	-54	112					301	2947			924	2619	217	3022	40	822.667
	E. coli LPS													2535	14509					-49	937
	E. coli LPS													64994	64303					27	528
	E. coli LPS													4622	29803					3057	3218
	E. coli LPS													479	38188					1908	15028
	E. coli LPS													82	3997
	E. coli LPS													67	2032
	E. coli LPS													1137	4982
	E. coli LPS													717	4132
	E. coli LPS													65	2790
	E. coli LPS													421	1251
	E. coli LPS													354	23642
	E. coli LPS													1046	25295
